RESEARCH ARTICLE

# Automated control for investigation of the insufflation-ventilation interaction in experimental laparoscopy

Willem van Weteringen<sup>1</sup> , Frank Sterke<sup>1,2</sup> , John Vlot<sup>1</sup>, René M. H. Wijnen<sup>1</sup>, Jenny Dankelman<sup>2\*</sup>

**1** Department of Pediatric Surgery, Erasmus MC Sophia Children's Hospital, University Medical Center Rotterdam, Rotterdam, The Netherlands, **2** Department of BioMechanical Engineering, Faculty of Mechanical Engineering, Delft University of Technology, Delft, The Netherlands

 These authors contributed equally to this work.

\* [j.dankelman@tudelft.nl](mailto:j.dankelman@tudelft.nl)

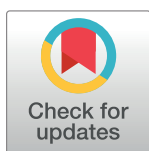

## Abstract

In laparoscopic surgery the abdominal cavity is insufflated with pressurized carbon dioxide gas to create workspace. This pressure is exerted through the diaphragm onto the lungs, competing with ventilation and hampering it. In clinical practice the difficulty of optimizing this balance can lead to the application of harmfully high pressures. This study set out to create a research platform for the investigation of the complex interaction between insufflation and ventilation in an animal model. The research platform was constructed to incorporate insufflation, ventilation and relevant hemodynamic monitoring devices, controlling insufflation and ventilation from a central computer. The core of the applied methodology is the fixation of physiological parameters by applying closed-loop control of specific ventilation parameters. For accurate volumetric measurements the research platform can be used in a CT scanner. An algorithm was designed to keep blood carbon dioxide and oxygen values stable, minimizing the effect of fluctuations on vascular tone and hemodynamics. This design allowed stepwise adjustment of insufflation pressure to measure the effects on ventilation and circulation. A pilot experiment in a porcine model demonstrated adequate platform performance. The developed research platform and protocol automation have the potential to increase translatability and repeatability of animal experiments on the bio-mechanical interactions between insufflation and ventilation.

## OPEN ACCESS

**Citation:** van Weteringen W, Sterke F, Vlot J, Wijnen RMH, Dankelman J (2023) Automated control for investigation of the insufflation-ventilation interaction in experimental laparoscopy. PLoS ONE 18(5): e0285108. <https://doi.org/10.1371/journal.pone.0285108>

**Editor:** Kevin Patrick Nolan, University College Dublin - National University of Ireland: University College Dublin, IRELAND

**Received:** July 19, 2022

**Accepted:** April 15, 2023

**Published:** May 5, 2023

**Copyright:** © 2023 van Weteringen et al. This is an open access article distributed under the terms of the [Creative Commons Attribution License](https://creativecommons.org/licenses/by/4.0/), which permits unrestricted use, distribution, and reproduction in any medium, provided the original author and source are credited.

**Data Availability Statement:** All relevant data are within the paper and its [Supporting Information](#) files.

**Funding:** This research was supported by research grants (J.V.) from Health-Holland, Top Sector Life Sciences & Health (LSHM17063) and Merck Sharp and Dohme (ISS57163). The funders had no role in study design, data collection and analysis, decision to publish, or preparation of the manuscript.

## Introduction

During laparoscopic surgery, pressurized carbon dioxide (CO<sub>2</sub>) gas is insufflated into the abdominal cavity. This gas volume forms the workspace in which the surgeon can operate. The pressure needed to create this workspace is exerted not only onto the abdominal wall, but onto the vascular system and internal abdominal organs as well [1]. Moreover, the intra-abdominal volume competes with the volume of the lungs through displacement of the diaphragm, causing a decrease in lung volume with the increase in intra-abdominal gas volume

**Competing interests:** J.V. received an insufflation device for this study from Karl Storz SE & Co. KG. The other authors have declared that no competing interests exist.

**Abbreviations:** CO, Cardiac output; CO<sub>2</sub>, Carbon dioxide; CT, Computed Tomography; ECG, Electrocardiogram; etCO<sub>2</sub>, End-tidal partial pressure of carbon dioxide; FIO<sub>2</sub>, Fraction of inspired oxygen; IAP, Intra-abdominal pressure; I:E ratio, Inspiratory-expiratory time ratio; MV, Mechanical ventilation; NIRS, Near-infrared spectroscopy; NMB, Neuromuscular blockade; O<sub>2</sub>, Oxygen; ORI, Oxygen Reserve Index; PaCO<sub>2</sub>, Arterial partial pressure of carbon dioxide; PaO<sub>2</sub>, Arterial partial pressure of oxygen; PEEP, Positive end-expiratory pressure; PIP, Positive inspiratory pressure; PTC, Post-tetanic count; RR, Respiratory rate; SaO<sub>2</sub>, Arterial oxygen saturation; SpO<sub>2</sub>, Peripherally measured arterial oxygen saturation; ScvO<sub>2</sub>, Central venous oxygen saturation; TOF, Train of four; Vt, Tidal volume.

[2–4]. This impairs the ability to ventilate patients during laparoscopy, requiring an increase in intrapulmonary pressure to maintain sufficient inspiratory lung volume and gas exchange and to prevent collapse during expiration. However, increased intrapulmonary pressures can result in lung damage and prolonged recovery [5, 6].

Extensive literature exists on the negative consequences of high pressures applied in ventilation and insufflation in patients undergoing laparoscopic surgery [7–9]. Although several studies have investigated the interaction between insufflation and ventilation, these have not led to methods for optimization during surgery [10, 11]. Separate guidelines have been developed, advising minimization of mechanical ventilation (MV) and insufflation pressures [12, 13]. Investigation of the interaction between insufflation and ventilation is complicated by the fact that both are simultaneously affected by pressure changes on either side of the diaphragm.

An important effect of abdominal insufflation with CO<sub>2</sub> gas is an increase in blood CO<sub>2</sub> levels [14, 15]. This results from a reduction in lung volume and consequently impaired ventilation, as well as from CO<sub>2</sub> uptake from the peritoneal cavity into the blood. In turn, high blood CO<sub>2</sub> levels affect the muscle tone of blood vessel walls, affecting physiological parameters throughout the body [16–18]. Hence, control of the blood CO<sub>2</sub> level is needed to reduce these effects. Management of oxygen (O<sub>2</sub>) is equally important, since even short periods of hypoxia can lead to a marked change in for example heart rate [19]. Other important factors influencing the interaction between insufflation and ventilation are compliances of the lungs and the abdomen, and the tone of the diaphragm and other muscles surrounding the abdominal and thoracic cavities. The muscle tone can be reduced using muscle relaxants, theoretically resulting in a more direct interaction between insufflation and ventilation [20–22].

The reproducibility of studies on biomechanics strongly depends on the methods for controlling parameters and on reducing the influence of variation between test subjects on outcome [23, 24]. A feasible method for investigating the interaction between ventilation and insufflation involves fixating the tidal lung volume while varying the insufflation pressure. This makes the abdominal volume and the ventilation pressure outcome parameters of changes in intra-abdominal pressure (IAP). The most accurate method for the repeated measurement of volumes is computed tomography (CT) imaging, which is only feasible in an animal model [25]. For investigation of the complex interactions involved, closed-loop control of ventilation parameters is very suitable for exclusion of the influence of blood gas fluctuations [26–28]. Although in clinical care closed-loop systems are increasingly used to stabilize patient conditions, in research such systems are rarely used to stabilize experimental conditions [29].

The aim of this study was to develop a research platform for investigation of the biomechanical interaction between surgical insufflation and mechanical ventilation in an animal model. To ensure repeatable conditions between experiments, the development of a closed-loop ventilation system aimed to minimize the effect of blood gas fluctuations. A pilot experiment was set up to evaluate the research platform and investigation method.

## Materials and methods

### Design considerations

Previous studies have shown that pig models are most representative of human physiology when investigating pulmonary dynamics and abdominal insufflation as separate topics [2, 30, 31]. The developed research platform had to be transportable and had to fit within the gantry of a CT scanner. To avoid accidental disconnection of data connections, vascular access or ventilation, the choice was made to create a single platform that houses the devices and animal. This provided several restrictions in the choice for the animal size and the number of devices. Animals with a weight approximating that of an adult human, in combination with the

required devices, would not fit onto a CT slide and would exceed the maximum weight tolerance. To this end, the target weight of the animal model was set to 20 kg.

## Selection of devices

**Insufflation and ventilation.** The core of the research platform are an insufflation device and a mechanical ventilator (Table 1). Both devices can be read out and controlled through a serial connection, allowing remote and automated control over all insufflation and ventilation parameters. Remote control of the ventilator is required to shorten the apneic time during CT scanning breath holds. Automated control in the form of closed-loop control of ventilation parameters is needed to adjust blood gas levels. Due to size considerations of both the device and the animal model, a neonatal/pediatric ventilator was chosen. The following devices were chosen:

- Insufflation: Endoflator UI 40 (Karl Storz SE & Co. KG, Tuttlingen, Germany).
- Mechanical ventilation: Fabian HFO (Acutronic AG, Hirzel, Switzerland).  
In addition to the pressure and flow measurements provided by these devices, a high-resolution system was chosen to verify insufflator and mechanical ventilator measurements:
- To verify measurements of pressure and flow: heated pneumotachographs (PNT 8410A, Hans Rudolph Inc., Shawnee, KS, United States) combined with pressure sensors that also provided the option of connecting an esophageal balloon catheter for intrathoracic pressure measurements.

List of selected devices, essential devices are required to control oxygenation and carbon dioxide levels and store data, other devices have been added to gather additional clinical and

**Table 1. Devices.**

|                | Description                  | Device                                                        | Manufacturer                      |
|----------------|------------------------------|---------------------------------------------------------------|-----------------------------------|
| Control        | Mechanical ventilator        | fabian™ HFO                                                   | Acutronic Medical Systems AG      |
|                | Surgical insufflator         | Endoflator® 40 UI                                             | Karl Storz GmbH                   |
|                | Patient monitor              | Root®                                                         | Masimo® Corporation               |
| Measurement    | Pulse oximeter               | Radical-7® Pulse CO-oximeter                                  | Masimo® Corporation               |
|                | Patient monitor              | IntelliVue MP20                                               | Koninklijke Philips N.V.          |
|                | Blood pressure               | Custom                                                        | Not applicable                    |
|                | Electrocardiography          | Custom                                                        | Not applicable                    |
|                | Hemodynamic monitor          | Pulsioflex™                                                   | Pulsion Medical Systems SE        |
|                | Hemodynamic monitor          | PiCCO2™                                                       | Pulsion Medical Systems SE        |
|                | Syringe pump                 | Injectomat Agilia®                                            | Fresenius Kabi AG                 |
|                | Infusion pump                | Infusomat® Space® P                                           | B. Braun Melsungen AG             |
|                | Neuromuscular blockade       | TOFscan®                                                      | Drägerwerk AG & Co. KGaA          |
|                | Trocar pressure/flow         | Custom                                                        | Not applicable                    |
|                | Transcutaneous blood gases   | SDM / OxiVenT™ Sensor                                         | Sentec AG                         |
|                |                              |                                                               |                                   |
| Infrastructure | Wifi router                  | Mi Wi-Fi Mini                                                 | Xiaomi                            |
|                | Power backup unit            | SMT1500IC                                                     | Schneider Electric Industries SAS |
|                | Software                     | LabVIEW™ 2018                                                 | National Instruments Corp.        |
|                | Serial device hub (2x)       | NPORT 5650-8-DT-J                                             | MOXA Inc.                         |
|                | Measurement/control computer | Universal: requires 3x USB and LabVIEW™ software              |                                   |
|                | Remote control laptop        | Universal: requires Microsoft Remote Desktop Protocol support |                                   |

<https://doi.org/10.1371/journal.pone.0285108.t001>

scientific data. Auxiliary devices have been added to overcome logistical challenges, for example, remote control during CT measurements.

**CO<sub>2</sub> and O<sub>2</sub> monitoring.** Monitoring devices were selected to observe the physiological effects of ventilation and insufflation. To increase the translational value of the measured parameters, standard of care devices were selected. All monitoring devices were required to have a connection for data readout. Commonly used technologies for CO<sub>2</sub> and O<sub>2</sub> monitoring were selected with response times and accuracy that would be able to provide input to a closed-loop ventilation algorithm. The following devices were selected:

- Monitoring the arterial oxygen saturation (SaO<sub>2</sub>): pulse oximetry (Masimo SET®, Masimo, Irvine, CA, United States) was used which provided a peripherally measured oxygen saturation (SpO<sub>2</sub>). For redundancy, three pulse oximeters were included, of which one with the Oxygen Reserve Index (ORI™). The ORI is calculated from arterial and venous saturation levels, which allows detection of oxygen levels surpassing full arterial hemoglobin saturation [32]. These sensors were connected to the mechanical ventilator, a Masimo ROOT and Masimo Radical 7 device.
- Measurement of cerebral and tissue oxygen levels: near-infrared spectroscopy (Masimo O3).
- Oxygen uptake: central venous oxygen saturation (ScvO<sub>2</sub>) measured with an intravascular optical catheter (CeVOX) connected to a monitor (PiCCO<sub>2</sub>, Getinge AB, Getinge, Sweden).
- End-tidal capnography (etCO<sub>2</sub>) was chosen as the primary CO<sub>2</sub> measurement, providing a continuous measurement with good accuracy during pneumoperitoneum [5, 33]. A mainstream capnograph (Philips Capnostat 5, Philips, Eindhoven, The Netherlands) was selected that could be interfaced directly with the mechanical ventilator.
- For non-invasive monitoring of the arterial partial pressures of carbon dioxide (PaCO<sub>2</sub>) and oxygen (PaO<sub>2</sub>), transcutaneous blood gas sensor (Sentec OxiVenT, Sentec AG, Therwil, Switzerland).

**Circulation monitoring.** The primary circulatory parameters that needed to be measured were heart rate, blood pressure and cardiac output.

- Electrocardiography: a compact patient monitor with optional filtering for electric interference (Philips MP40, Philips, Eindhoven, The Netherlands).
- Arterial and venous blood pressures were recorded at a sampling rate of 1000 Hz for offline pulse contour analyses. Pressures were measured using disposable transducers (Meritans DTX Plus, Merit Medical Ireland Ltd, Galway, Ireland) combined with two pre-amplifiers (CPJ2S, SCAIME SAS, Juvigny, France) and an analog-to-digital converter (USB-6002 DAQ, National Instruments, Austin, Texas, United States).
- For cardiac output (CO) measurements, the gold standard involves placement of a Swan-Ganz catheter within the heart. As the invasiveness of this method is poorly tolerated by the 20 kg porcine model, an alternative method was chosen. An intermittent absolute CO measurement was combined with a continuous relative CO measurement. This combination allows calibration of the pulse contour measurement at the beginning of an experiment. The absolute CO was measured with cold fluid thermodilution (PiCCO<sub>2</sub> monitor). Continuous CO was monitored with pressure-based pulse contour analysis (ProAQT sensor and Pulsio-Flex monitor, Getinge AB, Getinge, Sweden). The catheter for the fluid thermodilution measurement had a temperature sensor at the tip, which provided a continuous core temperature measurement.

**Anesthesia, sedation and muscle relaxation.** Monitoring of anesthetics, sedatives and fluids was included, as it was considered essential in maintaining hemodynamic stability and minimizing differences between experiments.

- Infusion and fluid management: pumps with a serial data output (Braun Infusomat® Space, B. Braun, Melsungen, Germany and Fresenius Kabi Injectomat® MC Agilia, Fresenius Health Care Group, Hamburg, Germany).
- To monitor the effect of neuromuscular blockade (NMB) and titrate the administered dose over time: train-of-four (TOF) and post-tetanic count (PTC) monitoring. The frequency of TOF and PTC measurements is limited due to the temporary and local depletion of neurotransmitters by the tetanic stimulus. To allow both measurements continuously and simultaneously two devices were included for placement at different extremities (Dräger TOFscan®, Drägerwerk AG & Co. KGaA, Lübeck, Germany).

## Data acquisition and protocol management

Serial data communication between all devices and a central computer system allows time-synchronized collection of all data streams, as well as control over insufflation and ventilation whilst running the experimental protocol. The central computer runs the program for managing the interface and closed-loop controller. The program was created using software for programming that included support for interface development, serial communication and automated file naming based on the study protocol and measurements, as well as timestamping of files and measurements (LabVIEW 2018 SP1, National Instruments, Austin, Texas, United States). A protocol management system was programmed that could execute the pre-programmed experimental steps and monitor progress. Timers and protocol step control were implemented in the interface. Protocol deviations could be corrected using manual overrides.

## Closed-loop ventilation and oxygenation

The aim of the closed-loop controller is to separate the control of  $O_2$  levels from the control of  $CO_2$  levels during insufflation by adapting MV settings. To achieve this, a set of possible system inputs (e.g. MV settings) and outputs (levels of  $CO_2$  or  $O_2$ ) was evaluated. Since all insufflators are pressure-controlled, IAP was selected as the controlled parameter for creating the surgical workspace. To prevent lung collapse and impairment of ventilation with increasing IAP, tidal volume-controlled MV was preferred over pressure-controlled MV. Other MV parameters that can be controlled are the fraction of inspired oxygen ( $FiO_2$ ), tidal volume ( $V_t$ ), positive end-expiratory pressure (PEEP), inspiratory-expiratory time ratio (I:E-ratio) and respiratory rate (RR). These parameters were evaluated for three criteria:

1. Adapting the parameters should have limited impact onto the investigated insufflation-ventilation interaction.
2. Adapting the parameter should control the level of  $O_2$  or  $CO_2$ .
3.  $O_2$  and  $CO_2$  levels should be controllable separately, with minimal influence on the other parameter.

For controlling oxygen levels,  $FiO_2$  was the only candidate system input. For stabilizing  $CO_2$  levels RR,  $V_t$ , PEEP and the I:E ratio were considered. RR was selected as system input, mainly because  $V_t$  and PEEP have a stronger impact on the investigated pressure-volume relationship and changing the I:E ratio was expected to provide limited control over  $CO_2$  levels.

Any CO<sub>2</sub> or O<sub>2</sub> measurement that could be obtained was considered as a potential input parameter. This included the transcutaneously measured partial pressure of carbon dioxide (tcPCO<sub>2</sub>), etCO<sub>2</sub>, SaO<sub>2</sub>, and ORI measurements. These measurements were evaluated for their accuracy, sensitivity in identifying changes in O<sub>2</sub> or CO<sub>2</sub> levels, as well as clinical usability. Oxygen levels were monitored using both SpO<sub>2</sub> and ORI, to allow control over PaO<sub>2</sub> levels in the range where hemoglobin saturation and subsequent SpO<sub>2</sub> values have reached 99 to 100%. SpO<sub>2</sub>. For management of CO<sub>2</sub> levels, etCO<sub>2</sub> was chosen as the output parameter. Although a measurement can be accurate, there is a delay between changing the MV settings and its effect. Changing the MV settings before observing the effect from the previous change could lead to swings in O<sub>2</sub> and CO<sub>2</sub> levels. The minimal time interval at which these effects are observed can be translated to a maximal control rate at which the closed-loop controller is executed. Response times and control stability were based on the physiology of the selected animal model and set to a 40 second interval.

## Pilot experiment

**Subject.** The performance of the closed-loop ventilation system, selected measurements, data acquisition and protocol management system were evaluated in a pilot experiment. A female Landrace pig with a targeted weight of 20 kg was selected for this pilot experiment. Environmentally enriched housing was provided. Until the start of the experiment water was available to the animal ad libitum, food was available until the morning of the experiment.

**Ethics statement.** All samples and data were collected using procedures in accordance with the Dutch Animal Testing act. The license number for this study for the Central Authority for Scientific Procedures on Animals was AVD101002015180. Institutional approval was given by the Animal Ethics Committee, protocol number 15-180-02,2,1. All experimental steps were executed according to pre-approved standard operating procedures.

**Anesthesia and instrumentation.** Before premedication of the animal, all devices were time-synchronized and pressure and flow measurements were calibrated. Intramuscular premedication was administered to the animal with ketamine 30 mg/kg, midazolam 1 mg/kg and atropine 0.03 mg/kg, followed by a 15 minute time window for the sedation to take effect. Adequate sedation was confirmed with nociceptive stimuli and by the absence of the corneal reflex. The animal was placed in supine position and after application of lidocaine onto the vocal cords it was intubated with a cuffed endotracheal tube. An esophageal balloon catheter was then placed. For maintenance of anesthesia an auricular intravenous cannula was placed, through which propofol 14 mg/kg/h and sufentanil 6.5 mg/kg/h were administered continuously. Fluid maintenance was provided with a crystalloid solution. Three-lead electrocardiography (ECG) monitoring was started with an electrode configuration tailored to pigs [34]. Using the modified Seldinger technique, intravascular access was obtained; a catheter in the femoral artery, a PiCCO catheter in the other femoral artery, a sheath in the femoral vein, and a multi-lumen catheter in the jugular vein in which a CeVOX catheter was placed. Near-infrared spectroscopy (NIRS) oxygen monitoring was placed over the brain and on the shoulder. A transcutaneous blood gas sensor was attached to the neck. A bladder catheter was placed. At the supra-umbilical level, a 12 mm trocar was placed (VersaOne™ Bladeless Optical Trocar with Fixation Cannula, Medtronic, Fridley, United States). Intraperitoneal placement was verified endoscopically.

**Muscle relaxation.** To control the effect of muscle tension on the interaction between intra-abdominal and intrathoracic pressures muscle relaxation was applied. For this pilot experiment deep muscle relaxation was chosen to exclude any effects of diaphragmatic muscle tension. The NMB monitors were attached to both lower limbs. Rocuronium levels were



titrated to a target TOF of 0 with a 50 mA stimulus and a PTC value of less than 2. Infusion of rocuronium was provided both cranially and caudally to minimize any blood pooling and release effects due to compression of abdominal blood vessels during abdominal insufflation and exsufflation.

**Study protocol.** After induction of anesthesia, instrumentation and titration of muscle relaxation, the research platform was transported from the lab to the CT scanner, where the study protocol was started. Ventilation was closed-loop controlled with a volume guarantee of 7.5 ml/kg and a PEEP of 5.0 hPa. To maintain stable CO<sub>2</sub> levels mild hypercapnia was permitted with a target etCO<sub>2</sub> of 7.0 kPa. The minimum allowed SpO<sub>2</sub> level was set to 97%, the ORI target range was set to 0.0–0.4. After the CO<sub>2</sub> insufflator had been attached to the trocar, insufflation was started and the abdominal insufflation was applied at pressure levels of 0, 5, 8, 10, 12, 14, 16, 18, 20, 16, 10, 5 and 0 hPa in a stepwise fashion. A stabilization time of 3 minutes was implemented between each step, after which a CT scan was made during an expiratory and inspiratory breath hold. After the experiment the animal was terminated under general anesthesia with a bolus of 10 ml potassium chloride 10%. The animal's organs were inspected for abnormalities at necropsy.

**Measurements and analysis.** To evaluate performance of the measurement devices, the closed-loop ventilation system and the protocol management system parameters on insufflation, oxygenation, ventilation and hemodynamics were plotted over time. Data was processed in MATLAB R2021a (The MathWorks, Inc., Natick, MA, United States) and visualized using Prism 9.2.0 (GraphPad Software, San Diego, CA, United States).

## Results

### Research platform

A functional and connectivity layout was designed for the research platform (Fig 1). The control software program was designed in separate modules which managed data acquisition and storage, protocol control, the interface, closed-loop ventilation and remote control. The separation of the modules minimized interdependency, allowing individual re-initialization of modules in case of failure during the experiment. The devices and central computer were mounted onto a X-ray translucent slide that, together with the animal, could be placed in a CT scanner. The entire platform could be transported on a cart that housed the insufflator, infusion pumps and a power backup unit.

### Interface and protocol management

An interface was created incorporating all functionalities of the research platform. For monitoring the condition of the subject, actual numbers and trends of vital parameters were shown. This was complemented by the settings and readings from the fluid pumps, insufflator and ventilator. Graphs of the real-time high-resolution pressure and flow measurements were implemented for monitoring of the pressure-volume relation. Settings for closed-loop ventilation control were provided, as well as manual control. Protocol management consisted of pre-programmed experiment steps that could be executed, automatically labelling all acquired data accordingly. This included storage of all devices settings.

### Closed-loop mechanical ventilation

**Algorithm.** CO<sub>2</sub> and O<sub>2</sub> levels were separately controlled by an algorithm (Fig 2). Target ranges of SpO<sub>2</sub>, ORI and etCO<sub>2</sub> could be input to the controller. Based on the provided continuous measurements, the controller determined the commands to be sent to the mechanical

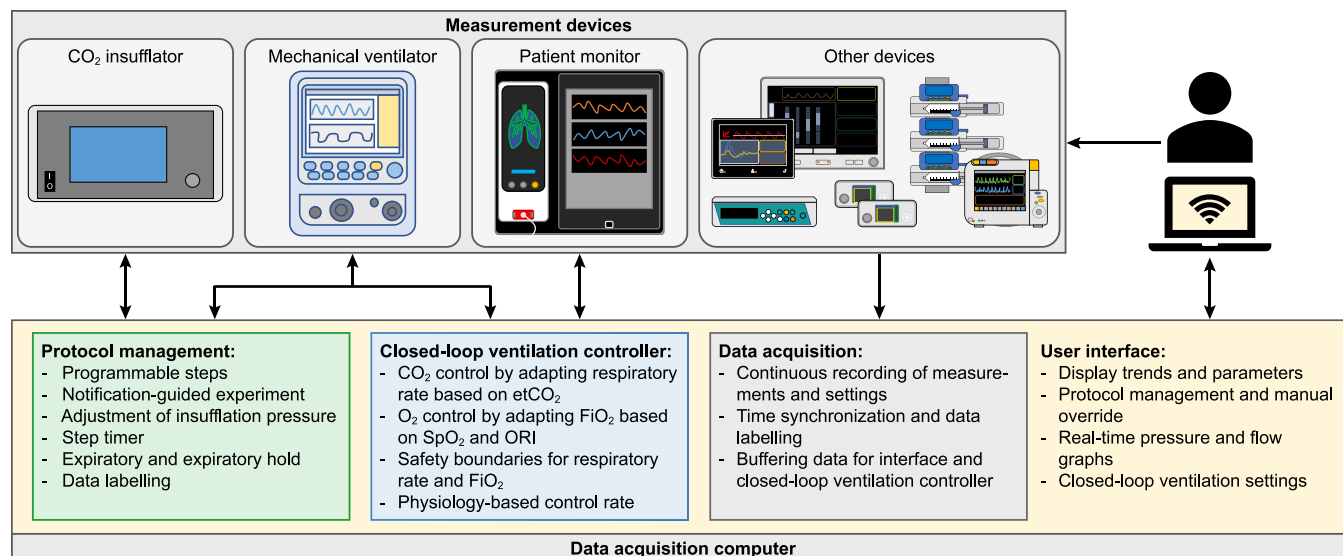

**Fig 1. Research platform communication diagram.** The primary measurement devices were the CO<sub>2</sub> insufflator, mechanical ventilator and patient monitor, which were coupled to the protocol management system and the closed-loop ventilation controller. The other monitoring devices were additionally recorded continuously. The main computer had four main functions, which included protocol management, closed-loop ventilation control, data acquisition and the presentation of the user interface. The researcher had the option to manually control all devices, as well as override the protocol and closed-loop system when needed.

<https://doi.org/10.1371/journal.pone.0285108.g001>

ventilator within the provided restraints. To provide comparable information on response times, the execution interval of 40 seconds was kept constant. Actuation was halted during breath holds. Measurements were checked for validity, the most recent 5 seconds of data were averaged and input to the algorithm.

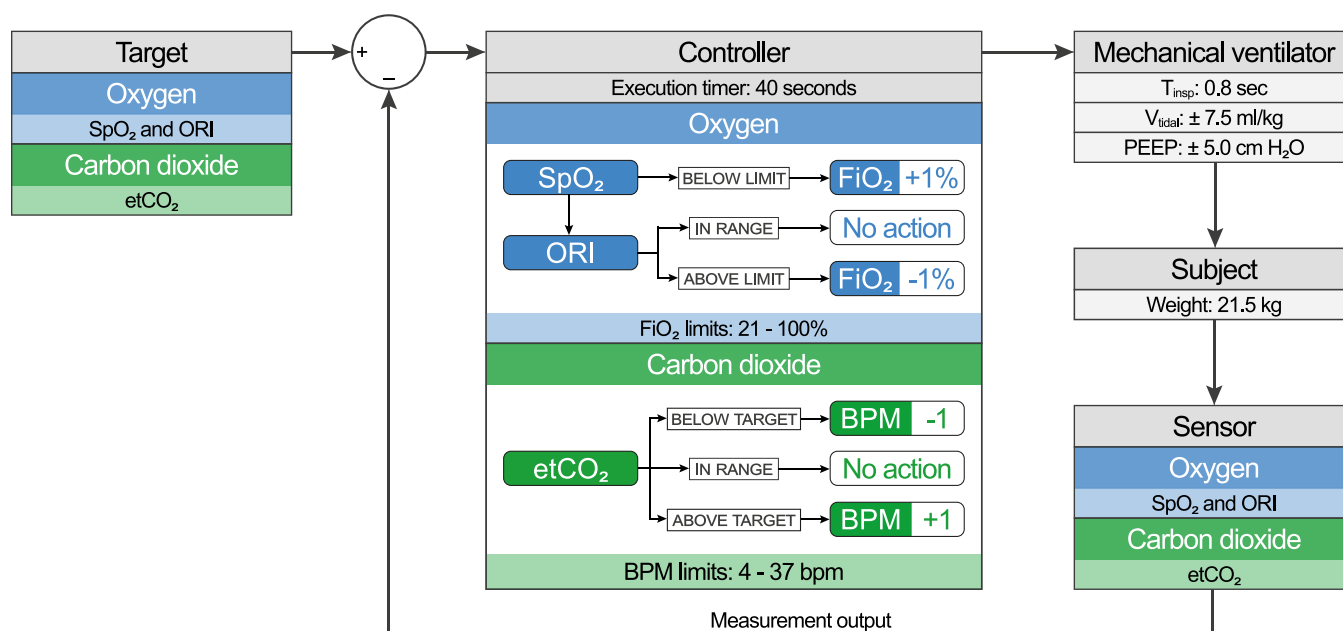

**Fig 2. Automated ventilation control diagram.** Targets for O<sub>2</sub> and CO<sub>2</sub> levels were compared to the measured saturation, ORI and etCO<sub>2</sub>. The controller algorithm used SpO<sub>2</sub> and ORI values to adjust FiO<sub>2</sub> and etCO<sub>2</sub> to adjust the respiratory rate. Tidal volume guarantee and inspiration time were set to a fixed value.

<https://doi.org/10.1371/journal.pone.0285108.g002>



**Oxygenation.** The inspired fraction of oxygen ( $\text{FiO}_2$ ) was automatically adjusted to control  $\text{SpO}_2$  and ORI levels, with the aim of providing an oxygen buffer for the breath holds by increasing the  $\text{FiO}_2$  with 1% when in an  $\text{SpO}_2$  range of 97–98% and an ORI range of 0.0 to 0.4. At a higher ORI level  $\text{FiO}_2$  was decreased with steps of 1%.

**Carbon dioxide ventilation.** To minimize the effect ventilation adjustments have onto static and dynamic pulmonary and abdominal mechanics, the tidal volume was fixed using volume guarantee. To prevent dynamic changes from affecting the lung condition over time, the inspiratory time was fixed at 0.8 s. This allowed automated adjustment of the RR in a range of 4 to 37 bpm to achieve the  $\text{CO}_2$  target. For safety, the RR could only adapt one bpm up or down every 40 seconds with the lower RR limit set to 10 bpm. To accommodate the expected increase in  $\text{CO}_2$  load during insufflation, permissive hypercapnia was applied with an  $\text{etCO}_2$  target of 7.0 kPa.

### Platform evaluation

The platform was evaluated in a pilot experiment on a 21.5 kg pig. The mechanical ventilator's volume guarantee mode was set to provide 160 mL per breath. Fig 3 shows the experimental platform during the experiment. The interaction between insufflation and ventilation and the resulting effects on other cardiorespiratory measurements during a series of increasing and decreasing IAP's is shown in Fig 4. The closed-loop ventilation algorithm approximated  $\text{etCO}_2$  levels to 7.0 kPa after each IAP step within the set 3 minutes of stabilization time, maintaining variability of the respiratory rate. Maintenance of an oxygen buffer prevented low saturation levels following breath holds. Both arterial and venous blood pressures were markedly affected by the IAP steps and the breath holds, while heart rate and cardiac output remained unaffected.

### Discussion

A research platform was developed for investigation of the interaction between intra-abdominal surgical gas insufflation and mechanical ventilation in an animal model. Pressures and volumes of insufflation and ventilation were measured with sensors and CT scanning. Closed-loop control adjusted mechanical ventilation to target preset blood gas levels. A central computer system provided connectivity with all devices and enabled presentation of an interface, execution of the closed-loop ventilation controller, protocol management and automation of data acquisition.

This is the first method for the detailed investigation of the direct interaction between insufflation and ventilation through the control of IAP. Key in this method is the fact that insufflation and ventilation can be controlled through either pressure or flow. Volume control is in practice based on the integration of flow. Since no available insufflators provide flow control, there was the necessity to use pressure as the input parameter. The advantage of this method is that it allows the application of small pressure increments to investigate the resulting intra-abdominal volume. With only the diaphragm separating the thoracic and abdominal cavities, the direct pressure interaction during insufflation is ideally studied without mechanical ventilation. However, in practice this will lead to a decrease in lung volume and subsequently in tidal volume, which can only be countered using a mechanical ventilator that guarantees a set tidal volume. In addition, the investigation of the intra-abdominal insufflated gas volume resulting from the insufflation pressure is preferably not affected by lung collapse. For these reasons, the choice was made to use mechanical ventilation with volume guarantee. For investigations of lung dynamics one could prefer the use of pressure control ventilation, for which adaptation of the closed-loop ventilation controller is required. Although the PEEP was kept

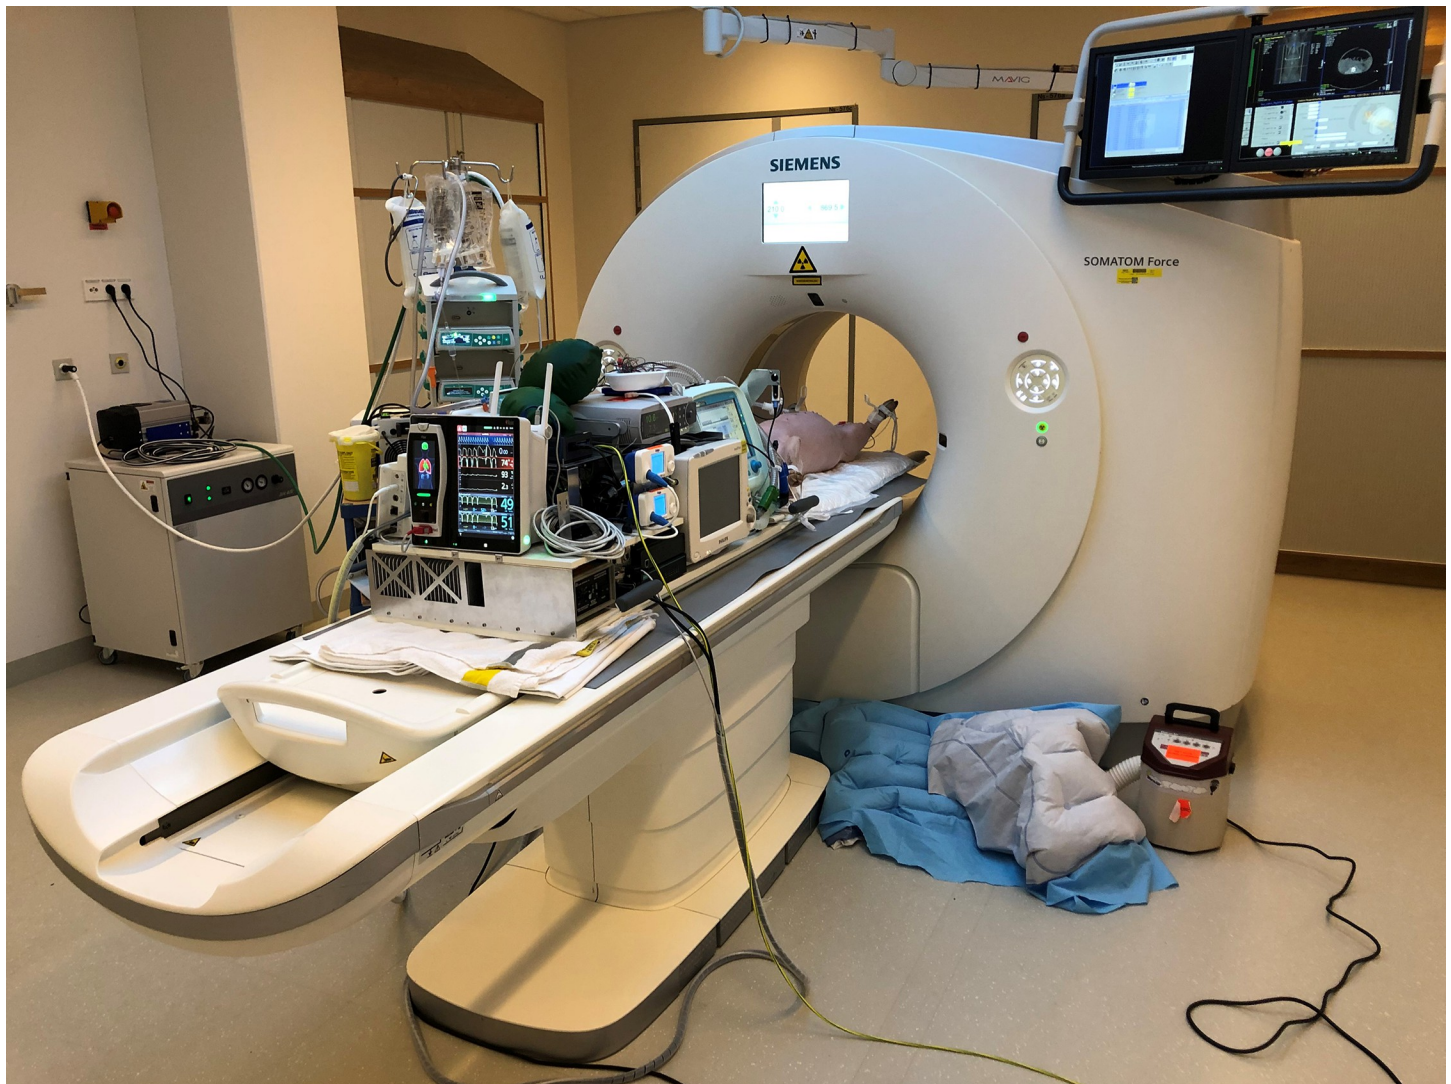

**Fig 3. Experimental platform.** Experimental platform during the pilot experiment with CT measurements in a porcine animal model.

<https://doi.org/10.1371/journal.pone.0285108.g003>

constant, most likely the residual lung volume was slightly decreased under the influence of insufflation pressures. Without the ability to measure and control residual lung volume, the use of a constant PEEP was preferred to keep experimental conditions constant. Combined with volume guarantee and a fixed inspiration time, changes in lung compliances could therefore be directly related to changes in the peak inspiratory pressure (PIP), as shown in Fig 4D.

This research platform is focused on controlling insufflation and mechanical ventilation, with the ultimate aim of optimizing patient conditions. The cardiovascular system, however, poses restrictions to the insufflation and ventilation pressures that can be applied. Despite the fact that perfusion outside of the thoracic and abdominal cavities is not easily affected due to the height of arterial blood pressures, venous return can already be affected by low pressures [35]. Perfusion of intra-abdominal organs such as the kidneys has been shown to be impaired during insufflation, most likely due to a strong decrease in venous return [36, 37]. In the thoracic cavity, similar impairment occurs when the pulmonary capillary wedge pressure is exceeded. However, pulmonary perfusion is affected by PEEP, PIP and the expiratory time.

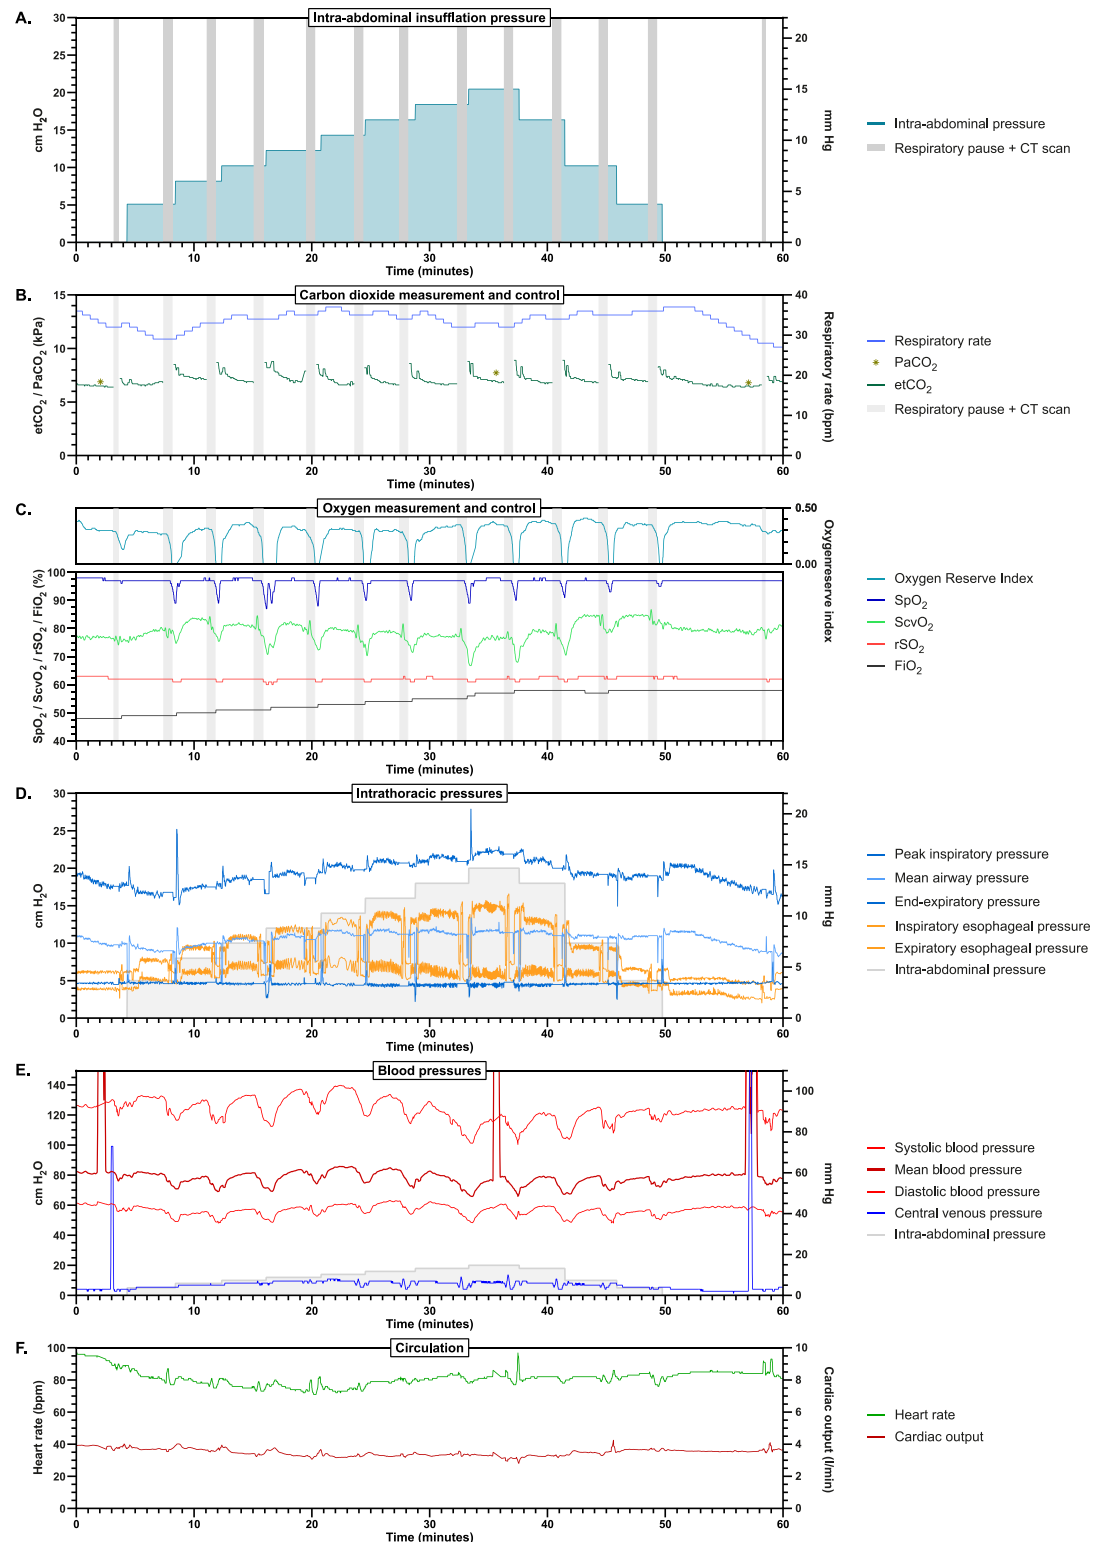

**Fig 4. Physiological measurements from pilot experiment.** The grey vertical bars indicate the respiratory pause for CT scanning. (A) Intra-abdominal insufflation pressure settings over time. (B) Measurement and control of CO<sub>2</sub>. The closed-loop adjusted respiratory rate setting of the mechanical ventilator in breaths per minute (blue line, right y-axis). End-tidal CO<sub>2</sub> levels measured at the airway opening (green line, left y-axis). The asterisks indicate the PaCO<sub>2</sub> measured from blood sampling. (C) Measurement and control of O<sub>2</sub>. The oxygen reserve index (green line, right axis). Oxygen saturation levels at different

locations: SpO<sub>2</sub>, ScvO<sub>2</sub> and rSO<sub>2</sub> (%; blue, green and red lines, left axis). The automatically adjusted FiO<sub>2</sub> provided by the mechanical ventilator (%; black line, left axis). (D) Intrathoracic pressures during insufflation, shown in cm H<sub>2</sub>O on left y-axis, mm Hg on right y-axis. For reference the set insufflation pressures are shown (grey). Peak inspiratory, mean and end-expiratory airway pressures (blue lines), with the end-expiratory pressure set to 5 cm H<sub>2</sub>O / 3.75 mm Hg. Peak inspiratory and end-expiratory pressures measured in the esophagus (orange lines). (E) Blood pressures, shown in cm H<sub>2</sub>O on left y-axis, mm Hg on right y-axis. Arterial blood pressures; systolic, mean and diastolic (red lines). Central venous blood pressure (blue line). Insufflation pressures are shown as reference (grey). The pressure spikes are artefacts due to closing of the line to the pressure transducer for blood gas sampling. (F) Circulation parameters; heart rate (bpm, green line, left axis) and cardiac output (L/min, red line, left axis).

<https://doi.org/10.1371/journal.pone.0285108.g004>

Investigation of insufflation and ventilation pressures should therefore always consider the effects on hemodynamics and tissue perfusion. For this reason the presented research platform includes continuous arterial and venous blood pressures measurements, as well as heart rate and cardiac output. The pilot experiment showed a stable central circulation, but organ perfusion parameters were not included. Although organ perfusion parameters would be very interesting for the investigation, the required perfusion scans using nephrotoxic contrast agents and placement of perfusion sensors that require incision of the abdominal wall were likely to have affected the investigation.

Systems for automated control of ventilation have been developed over the past 30 years [38]. The initial implementation in clinical devices has become common for functions that are based on mechanical feedback, such as volume control or pressure control options. Closed-loop systems in which the cardiorespiratory physiology is part of the loop are more challenging in terms of controllability due to longer or slower feedback loops, and are less predictable. As a consequence, clinical implementations have focused on specific single-parameter functions such as oxygen control [39]. Complex control systems are needed to deal with the variety in responses during clinical care. For investigation of the interaction between insufflation and ventilation a simple controller was chosen that was fast enough to compensate the relatively slow changes and corresponding physiological responses. The main challenge for this controller was to compensate for the respiratory pauses that were needed to minimize movement artefacts during CT scanning. Returning to the target levels within the set scanning interval of 3 minutes was therefore essential. Contrary to other controllers, the aim of this platform did not permit variation in tidal volumes, restricting the variable parameters to the ventilation frequency.

Using the volume of expired CO<sub>2</sub> to investigate peritoneal CO<sub>2</sub> uptake requires the etCO<sub>2</sub> to be kept constant to rule out the effects of CO<sub>2</sub> accumulation. Previous studies suggested that peritoneal CO<sub>2</sub> uptake gradually increases because etCO<sub>2</sub> levels and expired CO<sub>2</sub> volumes increase continuously for several hours during laparoscopy [14, 15]. This results from the assumption that keeping ventilation parameters constant will provide PaCO<sub>2</sub> or etCO<sub>2</sub> as an indicator of CO<sub>2</sub> load. Unfortunately, lung compliance changes during laparoscopy. If the mechanical ventilation parameters are not adapted, CO<sub>2</sub> accumulates in the bloodstream and tissues. The accumulation process decouples the relation between peritoneal CO<sub>2</sub> uptake and the expired volume of CO<sub>2</sub>. Increased etCO<sub>2</sub> levels indicate an increase in PaCO<sub>2</sub>, which is a consequence of CO<sub>2</sub> accumulation. Changes in lung compliance that occur during laparoscopy should therefore be addressed by adapting mechanical ventilation to keep etCO<sub>2</sub> constant. The expired CO<sub>2</sub> volume then approximates the net CO<sub>2</sub> output. This is a sum of the metabolic CO<sub>2</sub> production and peritoneal uptake. If the metabolic CO<sub>2</sub> production is constant, the changes in expired CO<sub>2</sub> volume reflect the changes in peritoneal CO<sub>2</sub> uptake. Factors that affect the metabolic rate, such as muscle relaxation and anesthesia, should not be adjusted during the experiment.



The ORI has been introduced as a parameter to warn for impending hypoxia during induction of anesthesia and intubation procedures. Rapidly decreasing hyperoxia is masked during these procedures by the inability to measure the hyperoxic buffer while showing fully saturated hemoglobin. Maintenance of a hyperoxic buffer could be attractive in procedures in which regular respiratory holds are either needed or expected. Based on Fick's principle, the index remains comparable over time as long as cardiac output and oxygen consumption are constant [32]. In the experimental setting ORI proved effective in achieving controlled hyperoxia, but in clinical practice the dynamic changes due to anesthesia and interventions might limit the use of this parameter. Regardless of the inaccuracy that can be introduced, it is likely that with the ORI parameter it will be possible to identify severe hyperoxia and adjust  $\text{FiO}_2$  accordingly.

With complex interactions, the degree of control of experimental conditions determines the relevance of output parameters. In the case of the presented research platform, lung mechanics and blood gas levels were identified as factors that should be controlled. If such indirect interactions are left uncontrolled, they considerably affect outcome and impair the reproducibility of experiments. In addition, the repeatability of results within experiments is increased as long as parameters are kept in check by closed-loop control. In our pilot experiment this was demonstrated by the return of  $\text{CO}_2$  and  $\text{O}_2$  values to the defined targets before each CT measurement. Exclusion of the vasotonic and cardiotoxic influence of these factors increases comparability of heart rate, blood pressure and cardiac output measurements at these points in time. Similarly, by keeping  $V_t$ , PEEP and the inspiratory time constant they did not affect the PIP required for the target  $V_t$ , making the PIP and intra-abdominal volume direct interaction outcome parameters for the applied IAP.

During the pilot experiment, only the level of IAP was adapted to investigate its effect onto PIP, intra-abdominal volume, CO, HR and BP. In future studies, this platform could be used to accurately investigate factors influencing the interaction between insufflation and ventilation, such as the depth of muscle and diaphragm relaxation, the effect of body size and other inter-individual differences in tissue compliance. The clinical consequences of surgical insufflation are substantial, and mostly related to the applied pressure and interaction with ventilation. Amongst the most important topics that can be investigated using this research platform are the effects of insufflation on venous return and organ perfusion [40], the optimal ventilation strategy during minimal access surgery [41], and the benefits of personalized insufflation pressure [42]. Other potential applications include research on ventilation methods, for which other animal models can be considered [43]. The research platform, animal model and experimental procedure have been selected to minimize the translational gap to clinical care. With the exception of repeated CT scanning all measurements can be reasonably applied in a clinical setting. Closed-loop control could therefore be used in a similar manner to increase the reproducibility of outcome in clinical investigations.

## Conclusions

- The developed research platform enables the investigation of the interaction between insufflation and ventilation in a porcine model.
- Closed-loop ventilation is able to maintain  $\text{CO}_2$  and  $\text{O}_2$  at target values in a model for laparoscopic  $\text{CO}_2$  insufflation.
- Automated control of experiment protocol, insufflation and ventilation enhances reproducibility of in vivo studies and minimizes the translational gap between animal research and clinical application.

## Supporting information

**S1 Checklist. The ARRIVE guidelines 2.0: Author checklist.**  
(PDF)

**S1 Data.**  
(XLSX)

## Acknowledgments

The authors would like to thank the department of Medical Technology at Erasmus MC Sophia Children's Hospital for their support. We would like to thank T.G. Goos, I.K.M. Reiss and the department of Neonatology for the provided equipment. The authors would like to thank Karl Storz SE & Co. KG for kindly providing the insufflation device for this study.

## Author Contributions

**Conceptualization:** Willem van Weteringen, Frank Sterke.

**Data curation:** Willem van Weteringen, Frank Sterke.

**Formal analysis:** Willem van Weteringen, Frank Sterke.

**Funding acquisition:** Willem van Weteringen, Frank Sterke.

**Investigation:** Willem van Weteringen, Frank Sterke.

**Methodology:** Willem van Weteringen, Frank Sterke, Jenny Dankelman.

**Project administration:** Willem van Weteringen, Frank Sterke, John Vlot, René M. H. Wijnen.

**Resources:** Willem van Weteringen, Frank Sterke, John Vlot, René M. H. Wijnen, Jenny Dankelman.

**Software:** Willem van Weteringen, Frank Sterke.

**Supervision:** Willem van Weteringen, Frank Sterke, John Vlot, René M. H. Wijnen, Jenny Dankelman.

**Validation:** Willem van Weteringen, Frank Sterke.

**Visualization:** Willem van Weteringen, Frank Sterke, Jenny Dankelman.

**Writing – original draft:** Willem van Weteringen, Frank Sterke, Jenny Dankelman.

**Writing – review & editing:** Willem van Weteringen, Frank Sterke, John Vlot, René M. H. Wijnen, Jenny Dankelman.

## References

1. Özdemir-van Brunschot DMD, van Laarhoven KCJHM, Scheffer GJ, Pouwels S, Wever KE, Warlé MC. What is the evidence for the use of low-pressure pneumoperitoneum? A systematic review. *Surg Endosc.* 2016; 30: 2049–2065. <https://doi.org/10.1007/s00464-015-4454-9> PMID: 26275545
2. Regli A, De Keulenaer BL, Singh B, Hockings LE, Noffsinger B, van Heerden PV. The respiratory pressure—abdominal volume curve in a porcine model. *Intensive Care Med Exp.* 2017; 5. <https://doi.org/10.1186/s40635-017-0124-7> PMID: 28243924
3. Loring SH, Behazin N, Novero A, Novack V, Jones SB, O'Donnell CR, et al. Respiratory mechanical effects of surgical pneumoperitoneum in humans. *J Appl Physiol.* 2014; 117: 1074–1079. <https://doi.org/10.1152/jappphysiol.00552.2014> PMID: 25213641



4. Malbrain MLNG, Peeters Y, Wise R. The neglected role of abdominal compliance in organ-organ interactions. *Critical Care*. Crit Care; 2016. <https://doi.org/10.1186/s13054-016-1220-x> PMID: 26983963
5. Valenza F, Chevillard G, Fossali T, Salice V, Pizzocri M, Gattinoni L. Management of mechanical ventilation during laparoscopic surgery. In: *Best Practice and Research: Clinical Anaesthesiology*. 2010 pp. 227–241. <https://doi.org/10.1016/j.bpa.2010.02.002> PMID: 20608559
6. Futier E, Constantin JM, Jaber S. Protective lung ventilation in operating room: A systematic review. *Minerva Anesthesiol*. 2014; 80: 726–735. PMID: 24226493
7. Jo YY, Kwak HJ. What is the proper ventilation strategy during laparoscopic surgery? *Korean Journal of Anesthesiology*. Korean Society of Anesthesiologists; 2017. pp. 596–600. <https://doi.org/10.4097/kjae.2017.70.6.596> PMID: 29225741
8. Nguyen NT, Anderson JT, Budd M, Fleming NW, Ho HS, Jahr J, et al. Effects of pneumoperitoneum on intraoperative pulmonary mechanics and gas exchange during laparoscopic gastric bypass. *Surg Endosc Other Interv Tech*. 2004; 18: 64–71. <https://doi.org/10.1007/s00464-002-8786-x> PMID: 14625752
9. Umamo GR, Delehay G, Noviello C, Papparella A. The “dark Side” of Pneumoperitoneum and Laparoscopy. *Minimally Invasive Surgery*. Hindawi Limited; 2021. <https://doi.org/10.1155/2021/5564745> PMID: 34094598
10. Wauters J, Claus P, Brosens N, McLaughlin M, Hermans G, Malbrain M, et al. Relationship between abdominal pressure, pulmonary compliance, and cardiac preload in a porcine model. *Crit Care Res Pract*. 2012; 2012. <https://doi.org/10.1155/2012/763181> PMID: 22454767
11. Bloomfield GL, Ridings PC, Blocher CR, Marmarou A, Sugerman HJ. A proposed relationship between increased intra-abdominal, intrathoracic, and intracranial pressure. *Crit Care Med*. 1997; 25: 496–503. <https://doi.org/10.1097/00003246-199703000-00020> PMID: 9118668
12. Moberg AC, Montgomery A. *Pneumoperitoneum—Update 2006. EAES Guidelines for Endoscopic Surgery: Twelve Years Evidence-Based Surgery in Europe*. Springer, Berlin, Heidelberg; 2006. pp. 87–95. [https://doi.org/10.1007/978-3-540-32784-4\\_3](https://doi.org/10.1007/978-3-540-32784-4_3)
13. Neudecker J, Sauerland S, Neugebauer EAM, Bergamaschi R, Bonjer HJ, Cuschieri A, et al. The EAES clinical practice guidelines on the pneumoperitoneum for laparoscopic surgery (2002). *EAES Guidelines for Endoscopic Surgery: Twelve Years Evidence-Based Surgery in Europe*. Springer, Berlin, Heidelberg; 2006. pp. 39–85. [https://doi.org/10.1007/978-3-540-32784-4\\_2](https://doi.org/10.1007/978-3-540-32784-4_2)
14. Eaton S, McHoney M, Giacomello L, Pacilli M, Bishay M, De Coppi P, et al. Carbon dioxide absorption and elimination in breath during minimally invasive surgery. *J Breath Res*. 2009; 3. <https://doi.org/10.1088/1752-7155/3/4/047005> PMID: 21386202
15. McHoney M, Corizia L, Eaton S, Kiely EM, Drake DP, Tan HL, et al. Carbon dioxide elimination during laparoscopy in children is age dependent. *Journal of Pediatric Surgery*. J Pediatr Surg; 2003. pp. 105–110. <https://doi.org/10.1053/jpsu.2003.50021> PMID: 12592630
16. Nguyen NT, Wolfe BM. The physiologic effects of pneumoperitoneum in the morbidly obese. *Annals of Surgery*. Ann Surg; 2005. pp. 219–226. <https://doi.org/10.1097/01.sla.0000151791.93571.70> PMID: 15650630
17. Gutt CN, Oniu T, Mehrabi A, Schemmer P, Kashfi A, Kraus T, et al. Circulatory and respiratory complications of carbon dioxide insufflation. *Digestive Surgery*. Dig Surg; 2004. pp. 95–105. <https://doi.org/10.1159/000077038> PMID: 15010588
18. Ho HS, Saunders CJ, Gunther RA, Wolfe BM. Effector of hemodynamics during laparoscopy: Co2 absorption or intra-abdominal pressure? *J Surg Res*. 1995; 59: 497–503. <https://doi.org/10.1006/jsre.1995.1198> PMID: 7564324
19. Pingitore A, Gemignani A, Menicucci D, Di Bella G, De Marchi D, Passera M, et al. Cardiovascular response to acute hypoxemia induced by prolonged breath holding in air. *Am J Physiol—Heart Circ Physiol*. 2008; 294. <https://doi.org/10.1152/ajpheart.00607.2007> PMID: 17993602
20. Bruintjes MH, Van Helden E V., Braat AE, Dahan A, Scheffer GJ, Van Laarhoven CJ, et al. Deep neuromuscular block to optimize surgical space conditions during laparoscopic surgery: a systematic review and meta-analysis. *Br J Anaesth*. 2017; 118: 834–842. <https://doi.org/10.1093/bja/aex116> PMID: 28575335
21. Özdemir-van Brunschot DMD, Braat AE, van der Jagt MFP, Scheffer GJ, Martini CH, Langenhuijsen JF, et al. Deep neuromuscular blockade improves surgical conditions during low-pressure pneumoperitoneum laparoscopic donor nephrectomy. *Surg Endosc*. 2018; 32: 245–251. <https://doi.org/10.1007/s00464-017-5670-2> PMID: 28643056
22. Barrio J, Errando CL, García-Ramón J, Sellés R, San Miguel G, Gallego J. Influence of depth of neuromuscular blockade on surgical conditions during low-pressure pneumoperitoneum laparoscopic cholecystectomy: A randomized blinded study. *J Clin Anesth*. 2017; 42: 26–30. <https://doi.org/10.1016/j.jclinane.2017.08.005> PMID: 28803124

23. Samsa G, Samsa L. A Guide to Reproducibility in Preclinical Research. *Academic Medicine*. Acad Med; 2019. pp. 47–52. <https://doi.org/10.1097/ACM.0000000000002351> PMID: 29995667
24. Samuel S, König-Ries B. Understanding experiments and research practices for reproducibility: An exploratory study. *PeerJ*. 2021; 9. <https://doi.org/10.7717/peerj.11140> PMID: 33976964
25. Vlot J, Wijnen R, Stolker RJ, Bax K. Optimizing working space in porcine laparoscopy: CT measurement of the effects of intra-abdominal pressure. *Surg Endosc*. 2013; 27: 1668–1673. <https://doi.org/10.1007/s00464-012-2654-0> PMID: 23239305
26. Martinoni EP, Pfister CA, Stadler KS, Schumacher PM, Leibundgut D, Bouillon T, et al. Model-based control of mechanical ventilation: design and clinical validation. *Br J Anaesth*. 2004; 92: 800–807. <https://doi.org/10.1093/bja/ae145> PMID: 15096447
27. Tehrani FT, Rogers M, Lo T, Malinowski T, Afuwape S, Lum M, et al. A dual closed-loop control system for mechanical ventilation. *J Clin Monit Comput*. 2004; 18: 111–129. <https://doi.org/10.1023/b:jocm.0000032744.99885.38> PMID: 15362273
28. Platen P Von, Pomprapa A, Lachmann B, Leonhardt S. The dawn of physiological closed-loop ventilation—A review. *Critical Care*. Crit Care; 2020. <https://doi.org/10.1186/s13054-020-2810-1> PMID: 32223754
29. Ghita M, Neckebroek M, Muresan C, Copot D. Closed-loop control of anesthesia: Survey on actual trends, challenges and perspectives. *IEEE Access*. 2020; 8: 206264–206279. <https://doi.org/10.1109/ACCESS.2020.3037725>
30. Judge EP, Hughes JML, Egan JJ, Maguire M, Molloy EL, O'Dea S. Anatomy and bronchoscopy of the porcine lung: A model for translational respiratory medicine. *American Journal of Respiratory Cell and Molecular Biology*. Am J Respir Cell Mol Biol; 2014. pp. 334–343. <https://doi.org/10.1165/rcmb.2013-0453TR> PMID: 24828366
31. Kobayashi E, Hishikawa S, Teratani T, Lefor AT. The pig as a model for translational research: Overview of porcine animal models at Jichi Medical University. *Transplantation Research*. BioMed Central; 2012. p. 8. <https://doi.org/10.1186/2047-1440-1-8> PMID: 23369409
32. Szmuk P, Steiner JW, Olomu PN, Ploski RP, Sessler DI, Ezri T. Oxygen reserve index a novel noninvasive measure of oxygen reserve—a pilot study. *Anesthesiology*. 2016; 124: 779–784. <https://doi.org/10.1097/ALN.0000000000001009> PMID: 26978143
33. NYARWAYA J -B MAZOIT J X, SAMII K. Are pulse oximetry and end-tidal carbon dioxide tension monitoring reliable during laparoscopic surgery? *Anaesthesia*. 1994; 49: 775–778. <https://doi.org/10.1111/j.1365-2044.1994.tb04449.x> PMID: 7978132
34. Nahas K, Baneux P, Detweiler D. Electrocardiographic monitoring in the Göttingen minipig. *Comp Med*. 2002; 52: 258–264.
35. Atkinson TM, Giraud GD, Togioka BM, Jones DB, Cigarroa JE. Cardiovascular and Ventilatory Consequences of Laparoscopic Surgery. *Circulation*. 2017; 135: 700–710. <https://doi.org/10.1161/CIRCULATIONAHA.116.023262> PMID: 28193800
36. Sodha S, Nazarian S, Adshead JM, Vasdev N, Mohan-S G. Effect of pneumoperitoneum on renal function and physiology in patients undergoing robotic renal surgery. *Current Urology*. Wolters Kluwer Health; 2015. pp. 1–4. <https://doi.org/10.1159/000442842> PMID: 26989363
37. Wever KE, Bruintjes MHD, Warlé MC, Hooijmans CR. Renal perfusion and function during pneumoperitoneum: A systematic review and meta-analysis of animal studies. *PLoS One*. 2016; 11. <https://doi.org/10.1371/journal.pone.0163419> PMID: 27657740
38. Wysocki M, Brunner JX. Closed-Loop Ventilation: An Emerging Standard of Care? *Critical Care Clinics*. Crit Care Clin; 2007. pp. 223–240. <https://doi.org/10.1016/j.ccc.2006.12.011> PMID: 17368167
39. Sturrock S, Williams E, Dassios T, Greenough A. Closed loop automated oxygen control in neonates—A review. *Acta Paediatrica*, International Journal of Paediatrics. Acta Paediatr; 2020. pp. 914–922. <https://doi.org/10.1111/apa.15089> PMID: 31715041
40. Hatipoglu S, Akbulut S, Hatipoglu F, Abdullayev R. Effect of laparoscopic abdominal surgery on splanchnic circulation: Historical developments. *World J Gastroenterol*. 2014; 20: 18165. <https://doi.org/10.3748/wjg.v20.i48.18165> PMID: 25561784
41. Balick-Weber CC, Nicolas P, Hedreville-Montout M, Blanchet P, Stéphan F. Respiratory and haemodynamic effects of volume-controlled vs pressure-controlled ventilation during laparoscopy: a cross-over study with echocardiographic assessment. *Br J Anaesth*. 2007; 99: 429–435. <https://doi.org/10.1093/bja/aem166> PMID: 17626027
42. Diaz-Cambronero O, Flor Lorente B, Mazzinari G, Vila Montañes M, García Gregorio N, Robles Hernandez D, et al. A multifaceted individualized pneumoperitoneum strategy for laparoscopic colorectal surgery: a multicenter observational feasibility study. *Surg Endosc*. 2019; 33: 252–260. <https://doi.org/10.1007/s00464-018-6305-y> PMID: 29951750

43. Rocco PRM, Marini JJ. What have we learned from animal models of ventilator-induced lung injury? *Intensive Care Medicine*. Nature Publishing Group; 2020. pp. 2377–2380. <https://doi.org/10.1007/s00134-020-06143-x> PMID: [32500178](https://pubmed.ncbi.nlm.nih.gov/32500178/)
